# Supplementary material for: Assessing the accuracy of remotely sensed fire datasets across the southwestern Mediterranean Basin
Source: Copernicus journal article supplement (doi:10.5194/nhess-21-73-2021), 2021-01-11
Supplement: Supplementary file 1 [file nhess-21-73-2021-supplement.zip]

Archive with 9 entries (8 files):
- Supplementary_data/
- Supplementary_data/GF_BA_ER.gif
- Supplementary_data/README.txt
- Supplementary_data/GF_NF_ER.gif
- Supplementary_data/FA_BA_ER.gif
- Supplementary_data/FRY_NF_ER.gif
- Supplementary_data/FA_NF_ER.gif
- Supplementary_data/FRY_BA_ER.gif
- nhess-21-73-2021-supplement-title-page.pdf
