# Supplementary material for: Assessing the accuracy of remotely sensed fire datasets across the southwestern Mediterranean Basin
Source: Copernicus journal article supplement (doi:10.5194/nhess-21-73-2021), 2021-01-11
Supplement: Supplementary file 1 [file nhess-21-73-2021-supplement.zip › nhess-21-73-2021-supplement-title-page.pdf]

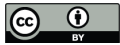

## *Supplement of*

# **Assessing the accuracy of remotely sensed fire datasets across the southwestern Mediterranean Basin**

**Luiz Felipe Galizia et al.**

*Correspondence to:* Luiz Felipe Galizia ([luiz.galizia@inrae.fr](mailto:luiz.galizia@inrae.fr))

- [nhess-21-73-2021-supplement-title-page.pdf](#)
- [Supplementary\\_data](#)
  - [FA\\_BA\\_ER.gif](#)
  - [FA\\_NF\\_ER.gif](#)
  - [FRY\\_BA\\_ER.gif](#)
  - [FRY\\_NF\\_ER.gif](#)
  - [GF\\_BA\\_ER.gif](#)
  - [GF\\_NF\\_ER.gif](#)
  - [README.txt](#)

The copyright of individual parts of the supplement might differ from the CC BY 4.0 License.
