# Supplementary material for: Assessing the accuracy of remotely sensed fire datasets across the southwestern Mediterranean Basin
Source: Copernicus journal article supplement (doi:10.5194/nhess-21-73-2021), 2021-01-11
Supplement: Supplementary file 1 [file nhess-21-73-2021-supplement.zip › Supplementary_data/README.txt]

Supplementary data: Animation of the spatial agreement of RS datasets of singles fires
-----------------------------------------------
-----------------------------------------------

Details of the animation
---------------------------
The product is composed of 6 files:

 - FA_BA_ER.gif: The relative error (ε) of the total burned area computed as the relative difference between Fire Atlas and Agencies data for all fire size thresholds
 - FA_NF_ER.gif: The relative error (ε) of the total number of fires computed as the relative difference between Fire Atlas and Agencies data for all fire size thresholds
 - FRY_BA_ER.gif: The relative error (ε) of the total burned area computed as the relative difference between FRY and Agencies data for all fire size thresholds
 - FRY_NF_ER.gif: The relative error (ε) of the total number of fires computed as the relative difference between FRY and Agencies data for all fire size thresholds
 - GF_BA_ER.gif: The relative error (ε) of the total burned area computed as the relative difference between GlobFire and Agencies data for all fire size thresholds
 - GF_NF_ER.gif: The relative error (ε) of the total number of fires computed as the relative difference between GlobFire and Agencies data for all fire size thresholds

 
The Spatial resolution of these animations is 0.25 degrees. 
