# Supplementary figures and images for: Assessing the accuracy of remotely sensed fire datasets across the southwestern Mediterranean Basin
Source: Copernicus journal article supplement (doi:10.5194/nhess-21-73-2021), 2021-01-11

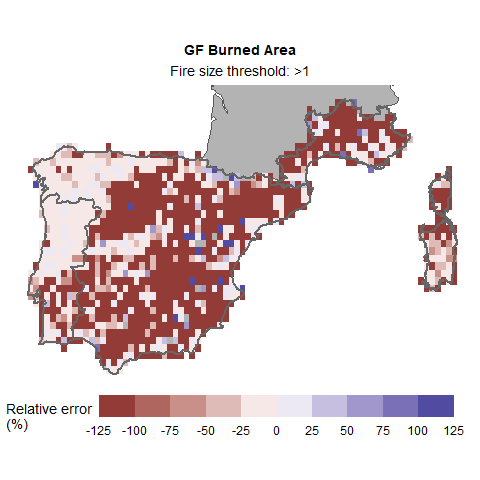

Supplement: Supplementary file 1 [file nhess-21-73-2021-supplement.zip › Supplementary_data/GF_BA_ER.gif]

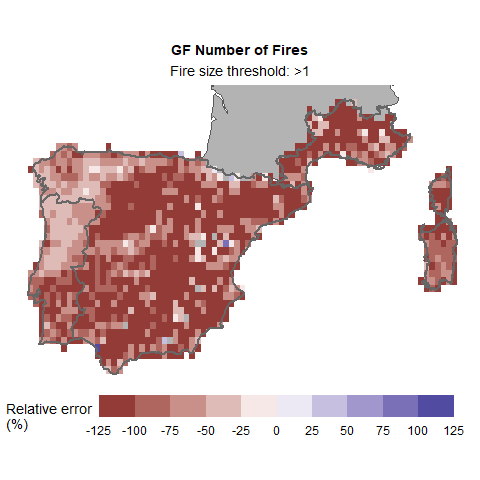

Supplement: Supplementary file 1 [file nhess-21-73-2021-supplement.zip › Supplementary_data/GF_NF_ER.gif]

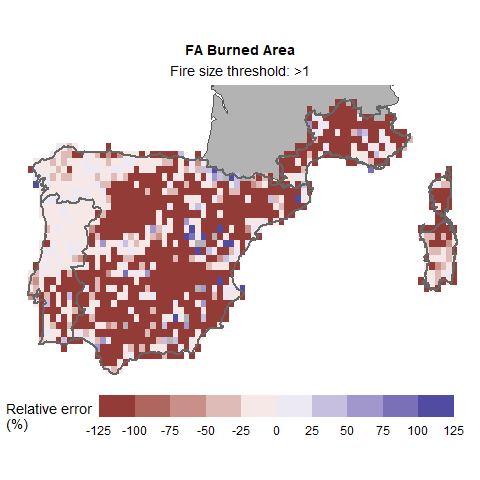

Supplement: Supplementary file 1 [file nhess-21-73-2021-supplement.zip › Supplementary_data/FA_BA_ER.gif]

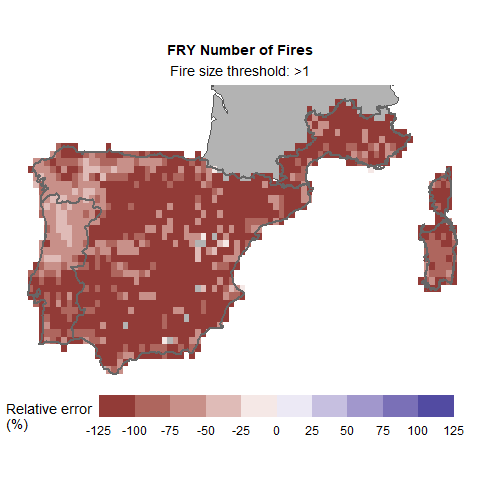

Supplement: Supplementary file 1 [file nhess-21-73-2021-supplement.zip › Supplementary_data/FRY_NF_ER.gif]

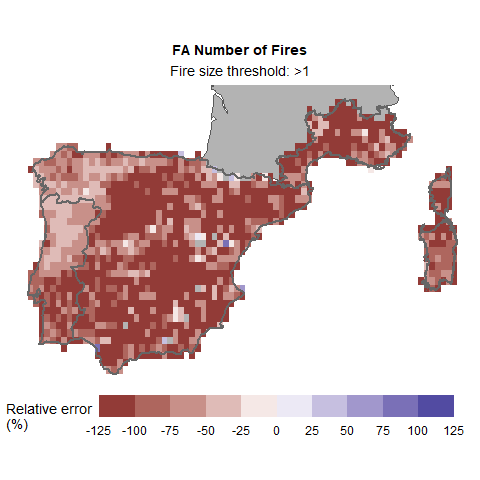

Supplement: Supplementary file 1 [file nhess-21-73-2021-supplement.zip › Supplementary_data/FA_NF_ER.gif]

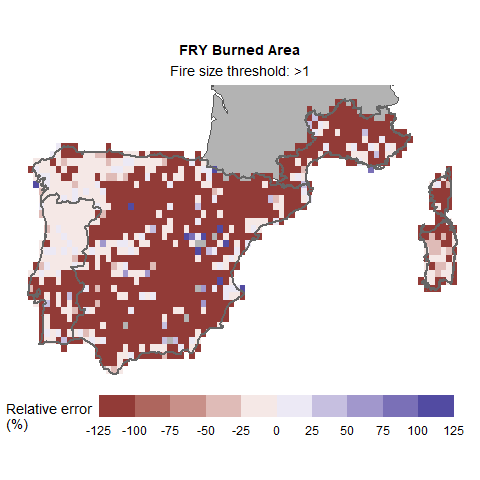

Supplement: Supplementary file 1 [file nhess-21-73-2021-supplement.zip › Supplementary_data/FRY_BA_ER.gif]
